# Supplementary material for: Evaluating the sensitivity of fine particulate matter (PM&lt;sub&gt;2.5&lt;/sub&gt;) simulations to chemical mechanism in Delhi
Source: Copernicus journal article supplement (doi:10.5194/acp-2020-673), 2020-08-27
Supplement: Supplementary file 1 [file acp-2020-673-supplement.pdf]

1 *Supplement of*

2 **Evaluating the sensitivity of fine particulate matter (PM<sub>2.5</sub>) simulations to chemical**  
3 **mechanism in Delhi**

4

5 Chinmay Jena<sup>1</sup>, Sachin D. Ghude<sup>1</sup>, Rachana Kulkarni<sup>1</sup>, Sreyashi Debnath<sup>1</sup>, Rajesh Kumar<sup>2</sup>,  
6 Vijay Kumar Soni<sup>3</sup>, Prodip Acharja<sup>1</sup>, Santosh H. Kulkarni<sup>4</sup>, Manoj Khare<sup>4</sup>, Akshara J.  
7 Kaginalkar<sup>4</sup>, Dilip M. Chate<sup>4</sup>, Kaushar Ali<sup>1</sup>, Ravi S. Nanjundiah<sup>1,5</sup>, Madhavan N. Rajeevan<sup>6</sup>

8

9

10 <sup>1</sup>Indian Institute of Tropical Meteorology, Ministry of Earth Sciences, India

11 <sup>2</sup>National Center for Atmospheric Research, Boulder, CO, USA

12 <sup>3</sup>India Meteorological Department, Ministry of Earth Sciences, New Delhi, India

13 <sup>4</sup>Centre for Development of Advanced Computing (C-DAC), Pune, Maharashtra, India

14 <sup>5</sup>Centre for Atmospheric and Oceanic Sciences, Indian Institute of Science, Bengaluru 560 012, India

15 <sup>6</sup>Ministry of Earth Sciences, Prithvi Bhavan, Lodhi Road, New Delhi 110003, India

16

17

18 **Correspondence: chinmayjena@tropmet.res.in, sachinghude@tropmet.res.in**

19

20

21

22

23

24

25

26

27

28

29

30

31

32

33

35 **Table S1:** Selected atmospheric physical and chemical parameterizations

| <b>Atmospheric Process</b>     | <b>Parameterization</b>                                                                                                                                                                                                                                                                                                   |
|--------------------------------|---------------------------------------------------------------------------------------------------------------------------------------------------------------------------------------------------------------------------------------------------------------------------------------------------------------------------|
| Cloud Microphysics             | Marrison 2-mom scheme (Marrison et al., 2009)                                                                                                                                                                                                                                                                             |
| Short- and Long-wave radiation | Rapid Radiative Transfer Model for GCMs (Iacono et al., 2008)                                                                                                                                                                                                                                                             |
| Surface Layer                  | Monin-Obukhov (Janjic Eta)Scheme (Janjic, 1996, 2002)                                                                                                                                                                                                                                                                     |
| Land Surface model             | Unified Noah Land-surface model (Tewari et al., 2004)                                                                                                                                                                                                                                                                     |
| Planetary Boundary Layer       | BouLac TKE (Bougeault and Lacarrere, 1989)                                                                                                                                                                                                                                                                                |
| Cumulus                        | Grell-Freitas ensemble scheme (Grell&Freitas, 2014)                                                                                                                                                                                                                                                                       |
| Gas-phase Chemistry            | Model for Ozone and Related Tracers (Emmons et al., 2010) and Carbon Bond 5 (CB05) (Yarwood et al., 2005)                                                                                                                                                                                                                 |
| Aerosol Processes              | Goddard Global Ozone Chemistry Aerosol Radiation and Transport (GOCART) (Chin et al., 2000), Model for Simulating Aerosol Interactions and Chemistry/ Volatility Basis Set (MOSAIC) (Zaveri et al., 2008) and Modal Aerosol Dynamics Model for Europe/Secondary Organic Aerosol Model(MADE/SORGAM) (Ahmadov et al., 2012) |

**Table S2:** Air pollution monitoring stations

| State         | Station name                     | Latitude   | Longitude  | Measurements                                                                                                                         |
|---------------|----------------------------------|------------|------------|--------------------------------------------------------------------------------------------------------------------------------------|
| Delhi         | AnandVihar                       | 28.646835  | 77.316032  | PM <sub>2.5</sub>                                                                                                                    |
|               | Aya Nagar                        | 28.4706914 | 77.1099364 | PM <sub>2.5</sub>                                                                                                                    |
|               | Burari Crossing                  | 28.7256504 | 77.2011573 | PM <sub>2.5</sub>                                                                                                                    |
|               | CRRM Mathura                     | 28.5512005 | 77.2735737 | PM <sub>2.5</sub>                                                                                                                    |
|               | DTU                              | 28.7500499 | 77.1112615 | PM <sub>2.5</sub>                                                                                                                    |
|               | IGI-Airport-T3                   | 28.5627763 | 77.1180053 | PM <sub>2.5</sub> , SO <sub>4</sub> ,NO <sub>3</sub> , NH <sub>4</sub> , CL, BC,OC, O <sub>3</sub> ,NH <sub>3</sub> ,SO <sub>2</sub> |
|               | IHBAS-Dilshad-Garden             | 28.6811736 | 77.3025234 | PM <sub>2.5</sub>                                                                                                                    |
|               | ITO                              | 28.6316945 | 77.2494387 | PM <sub>2.5</sub>                                                                                                                    |
|               | Lodhi Road                       | 28.5918245 | 77.2273074 | PM <sub>2.5</sub>                                                                                                                    |
|               | MandirMarg                       | 28.636429  | 77.201067  | PM <sub>2.5</sub>                                                                                                                    |
|               | North Campus DU                  | 28.6573814 | 77.1585447 | PM <sub>2.5</sub>                                                                                                                    |
|               | NSIT Dwarka                      | 28.60909   | 77.0325413 | PM <sub>2.5</sub>                                                                                                                    |
|               | Punjabi Bagh                     | 28.563262  | 77.186937  | PM <sub>2.5</sub>                                                                                                                    |
|               | Pusa IMD                         | 28.639645  | 77.146263  | PM <sub>2.5</sub>                                                                                                                    |
|               | R. K. Puram                      | 28.674045  | 77.131023  | PM <sub>2.5</sub>                                                                                                                    |
| Punjab        | Shadipur                         | 28.6514781 | 77.1473105 | PM <sub>2.5</sub>                                                                                                                    |
|               | Sirifort                         | 28.5504249 | 77.2159377 | PM <sub>2.5</sub>                                                                                                                    |
|               | Amritsar-Golden                  | 31.62      | 74.876512  | PM <sub>2.5</sub>                                                                                                                    |
| Haryana       | Ludhiana-Agricultural-University | 30.9028    | 75.8086    | PM <sub>2.5</sub>                                                                                                                    |
|               | Gobindgarh RIMT, Mandi           | 30.649961  | 76.331442  | PM <sub>2.5</sub>                                                                                                                    |
|               | Sector- 16A, Faridabad           | 28.4088421 | 77.3099081 | PM <sub>2.5</sub>                                                                                                                    |
| Uttar Pradesh | VikasSadan, Gurugram             | 28.4501238 | 77.0263051 | PM <sub>2.5</sub>                                                                                                                    |
|               | Sector-6 Panchkula               | 30.7057778 | 76.8531805 | PM <sub>2.5</sub>                                                                                                                    |
|               | MD University, Rohtak            | 28.870083  | 76.620500  | PM <sub>2.5</sub>                                                                                                                    |
|               | Sanjay Palace, Agra              | 27.1986583 | 78.0059806 | PM <sub>2.5</sub>                                                                                                                    |
| Rajasthan     | Vasundhara, Ghaziabad            | 28.6603346 | 77.3572563 | PM <sub>2.5</sub>                                                                                                                    |
|               | Nehru Nagar, Kanpur              | 26.4703136 | 80.3229863 | PM <sub>2.5</sub>                                                                                                                    |
|               | Central School Lucknow           | 26.8821003 | 80.9302753 | PM <sub>2.5</sub>                                                                                                                    |
|               | Lajpat Nagar, Moradabad          | 28.825341  | 78.7213009 | PM <sub>2.5</sub>                                                                                                                    |
|               | Sector -62 Noida                 | 28.6245479 | 77.3577104 | PM <sub>2.5</sub>                                                                                                                    |
|               | Ardhali Bazar, Varanasi          | 25.3505986 | 82.9083074 | PM <sub>2.5</sub>                                                                                                                    |
|               | MotiDoongri, Alwar               | 27.554793  | 76.611536  | PM <sub>2.5</sub>                                                                                                                    |
| Rajasthan     | RIICO Ind., Bhiwadi              | 28.194909  | 76.862296  | PM <sub>2.5</sub>                                                                                                                    |
|               | Adarsh Nagar, Jaipur             | 26.902909  | 75.836853  | PM <sub>2.5</sub>                                                                                                                    |
|               | Collectorate, Jodhpur            | 26.268249  | 73.0193853 | PM <sub>2.5</sub>                                                                                                                    |
|               | Police Commissionerate, Jaipur   | 26.9164092 | 75.7994901 | PM <sub>2.5</sub>                                                                                                                    |
|               | Shastri Nagar, Jaipur            | 26.9502929 | 75.730943  | PM <sub>2.5</sub>                                                                                                                    |
|               | ShrinathPuram, Kota              | 25.14389   | 75.821256  | PM <sub>2.5</sub>                                                                                                                    |
|               | Indira Vistar, Pali              | 25.771061  | 73.340227  | PM <sub>2.5</sub>                                                                                                                    |
|               | Ashok Nagar, Udaipur             | 24.5886166 | 73.6321397 | PM <sub>2.5</sub>                                                                                                                    |

**Table S3:** Index of Agreement (IOA), mean bias (MB), normalized mean bias (NMB), and root mean squared error (RMSE) of hourly values of PM<sub>2.5</sub> for the MOZART-GOCART (MG), MOZART-MOSAIC (MM), and CB05-MADE/SORGAM(CMS) mechanisms over Delhi.

|                   |                | MOZART-GOCART   |              |              |             | MOZART-MOSAIC |              |              |             | CB05-MADE/SORGAM |              |              |             |      |
|-------------------|----------------|-----------------|--------------|--------------|-------------|---------------|--------------|--------------|-------------|------------------|--------------|--------------|-------------|------|
| State             | Stations       | MB              | NMB (%)      | RMSE         | IOA         | MB            | NMB (%)      | RMSE         | IOA         | MB               | NMB (%)      | RMSE         | IOA         |      |
| PM <sub>2.5</sub> | Delhi          | AnandVihar      | -186.7       | -65.0        | 231.1       | 0.50          | -96.9        | -33.7        | 167.9       | 0.65             | -108.2       | -37.7        | 175.2       | 0.64 |
|                   |                | AyaNagar        | -75.3        | -51.5        | 98.2        | 0.51          | -24.5        | -16.7        | 79.45       | 0.65             | -46.9        | -32.1        | 85.1        | 0.62 |
|                   |                | BurariCrossing  | -42.8        | -32.0        | 76.0        | 0.53          | 33.2         | 24.9         | 105.0       | 0.54             | 14.9         | 11.1         | 100.2       | 0.55 |
|                   |                | CRRIMathura     | -85.3        | -45.9        | 126.9       | 0.54          | -3.6         | -1.9         | 115.5       | 0.70             | -13.6        | -7.3         | 122.9       | 0.69 |
|                   |                | DTU             | -206.5       | -72.3        | 256.0       | 0.46          | -136.6       | -47.9        | 203.0       | 0.52             | -157.9       | -55.3        | 216.7       | 0.51 |
|                   |                | IHBAS Dilshad   | -23.7        | -19.3        | 58.8        | 0.62          | 64.1         | 52.3         | 128.2       | 0.46             | 52.3         | 42.6         | 125.3       | 0.46 |
|                   |                | ITO             | -97.2        | -49.0        | 131.1       | 0.50          | -14.6        | -7.3         | 124.2       | 0.59             | -24.0        | -12.1        | 133.9       | 0.58 |
|                   |                | LodhiRoad       | -70.6        | -41.8        | 113.4       | 0.51          | 8.2          | 4.8          | 123.1       | 0.58             | -3.5         | -2.1         | 130.5       | 0.56 |
|                   |                | MandirMarg      | -115.2       | -56.3        | 147.3       | 0.50          | -39.5        | -19.3        | 119.8       | 0.62             | -58.8        | -28.7        | 125.3       | 0.61 |
|                   |                | North Campus DU | -98.4        | -52.5        | 141.1       | 0.51          | -23.7        | -12.6        | 122.9       | 0.60             | -42.8        | -22.8        | 127.1       | 0.59 |
|                   |                | NSIT Dwarka     | -120.6       | -60.1        | 143.0       | 0.47          | -58.9        | -29.4        | 112.8       | 0.58             | -81.9        | -40.8        | 121.3       | 0.56 |
|                   |                | Punjabi Bagh    | -155.5       | -64.0        | 193.6       | 0.49          | -89.4        | -36.8        | 150.3       | 0.62             | -103.5       | -42.6        | 160.3       | 0.61 |
|                   |                | PusaIMD         | -36.4        | -29.2        | 69.4        | 0.60          | 36.3         | 29.2         | 102.9       | 0.57             | 18.1         | 14.5         | 96.6        | 0.58 |
|                   |                | RKPuram         | -127.3       | -58.7        | 156.2       | 0.50          | -50.9        | -23.5        | 117.9       | 0.66             | -69.3        | -31.9        | 127.0       | 0.63 |
|                   |                | Shadipur        | -96.6        | -52.1        | 142.0       | 0.50          | -21.4        | -11.5        | 122.0       | 0.63             | -40.3        | -21.7        | 125.5       | 0.62 |
| Sirifort          | -124.6         | -58.3           | 157.3        | 0.48         | -56.7       | -26.5         | 128.7        | 0.59         | -75.4       | -35.3            | 137.6        | 0.57         |             |      |
|                   | <b>Average</b> | <b>-100.9</b>   | <b>-52.9</b> | <b>146.3</b> | <b>0.50</b> | <b>-27.0</b>  | <b>-14.1</b> | <b>127.3</b> | <b>0.61</b> | <b>-43.7</b>     | <b>-22.9</b> | <b>133.1</b> | <b>0.59</b> |      |

**Table S4:** Index of Agreement (IOA), mean bias (MB), normalized mean bias (NMB), and root mean squared error (RMSE) of hourly values of PM<sub>2.5</sub> for the MOZART-GOCART (MG), MOZART-MOSAIC (MM), and CB05-MADE/SORGAM (CMS) mechanisms over Punjab, Haryana, Uttar Pradesh, and Rajasthan.

|                   |               | MOZART-GOCART          |               |              |              |             | MOZART-MOSAIC |              |              |             | CB05-MADE/SORGAM |              |              |             |
|-------------------|---------------|------------------------|---------------|--------------|--------------|-------------|---------------|--------------|--------------|-------------|------------------|--------------|--------------|-------------|
|                   | State         | Stations               | MB            | NMB (%)      | RMSE         | IOA         | MB            | NMB (%)      | RMSE         | IOA         | MB               | NMB (%)      | RMSE         | IOA         |
| PM <sub>2.5</sub> | Punjab        | Amritsar               | -26.6         | -30.1        | 54.0         | 0.46        | 19.6          | 22.2         | 56.3         | 0.53        | 4.7              | 5.3          | 47.3         | 0.59        |
|                   |               | Ludhiana Agri. Uni.    | -19.8         | -24.4        | 46.0         | 0.39        | 15.7          | 19.4         | 49.7         | 0.44        | 7.6              | 9.4          | 45.5         | 0.47        |
|                   |               | Gobindgarh RIMT        | -31.6         | -38.2        | 60.1         | 0.40        | -3.9          | -4.8         | 51.8         | 0.42        | -14.9            | -18.1        | 54.2         | 0.34        |
|                   |               | <b>Average</b>         | <b>-24.7</b>  | <b>-29.4</b> | <b>52.1</b>  | <b>0.42</b> | <b>13.1</b>   | <b>15.5</b>  | <b>52.6</b>  | <b>0.48</b> | <b>1.9</b>       | <b>2.2</b>   | <b>48.1</b>  | <b>0.51</b> |
|                   | Haryana       | Sector- 16A            | -114.3        | -62.6        | 237.6        | 0.28        | -61.7         | -33.8        | 219.1        | 0.30        | -83.2            | -45.5        | 227.9        | 0.29        |
|                   |               | VikasSadana            | -82.4         | -58.1        | 105.7        | 0.48        | -39.7         | -28.0        | 80.8         | 0.58        | -57.4            | -40.5        | 88.0         | 0.56        |
|                   |               | Sector-6 Panchkula     | -56.7         | -62.4        | 68.2         | 0.41        | -44.2         | -48.7        | 60.5         | 0.41        | -49.1            | -54.1        | 62.4         | 0.42        |
|                   |               | MD University          | -73.1         | -55.4        | 91.1         | 0.46        | -29.2         | -22.1        | 69.1         | 0.51        | -44.2            | -33.5        | 74.6         | 0.50        |
|                   |               | <b>Average</b>         | <b>-82.7</b>  | <b>-59.6</b> | <b>144.7</b> | <b>0.35</b> | <b>-43.7</b>  | <b>-31.5</b> | <b>128.1</b> | <b>0.41</b> | <b>-58.9</b>     | <b>-42.4</b> | <b>134.2</b> | <b>0.39</b> |
|                   | Uttar Pradesh | Sanjay Palace          | -147.1        | -71.1        | 173.3        | 0.45        | -90.8         | -43.6        | 137.4        | 0.47        | -127.8           | -61.8        | 154.9        | 0.49        |
|                   |               | Vasundhara             | -195.0        | -65.4        | 241.2        | 0.49        | -100.0        | -33.4        | 214.3        | 0.44        | -106.1           | -35.6        | 179.3        | 0.63        |
|                   |               | Nehru Nagar            | -176.5        | -73.2        | 225.2        | 0.43        | -112.1        | -46.2        | 186.3        | 0.44        | -158.0           | -65.5        | 208.9        | 0.45        |
|                   |               | Central School Lucknow | -95.8         | -59.3        | 120.1        | 0.43        | -34.1         | -21.0        | 97.1         | 0.41        | -79.4            | -49.1        | 106.9        | 0.45        |
|                   |               | Lajpat Nagar           | -93.3         | -61.4        | 164.1        | 0.40        | -53.9         | -35.3        | 142.1        | 0.41        | -75.4            | -49.6        | 155.3        | 0.37        |
|                   |               | Sector -62 Noida       | -13.6         | -11.7        | 69.3         | 0.58        | 74.4          | 63.4         | 157.2        | 0.34        | 71.5             | 61.2         | 150.9        | 0.47        |
|                   |               | Ardhali Bazar          | -134.1        | -63.1        | 186.1        | 0.47        | -64.1         | -30.0        | 150.0        | 0.44        | -101.9           | -47.9        | 161.7        | 0.49        |
|                   |               | <b>Average</b>         | <b>-126.5</b> | <b>-62.2</b> | <b>180.8</b> | <b>0.45</b> | <b>-58.4</b>  | <b>-28.5</b> | <b>162.3</b> | <b>0.45</b> | <b>-84.6</b>     | <b>-42.3</b> | <b>162.8</b> | <b>0.52</b> |
|                   | Rajasthan     | MotiDoongri, Alwar     | -46.9         | -50.2        | 71.2         | 0.46        | -19.8         | -21.2        | 59.3         | 0.52        | -34.0            | -36.4        | 61.4         | 0.51        |
|                   |               | RIICO Ind., Bhiwadi    | -124.6        | -70.0        | 148.0        | 0.43        | -88.4         | -49.7        | 118.8        | 0.48        | -107.2           | -60.2        | 132.3        | 0.46        |
|                   |               | Adarsh Nagar, Jaipur   | -11.7         | -19.8        | 29.0         | 0.47        | 20.8          | 35.2         | 45.7         | 0.38        | 1.8              | 3.0          | 27.9         | 0.49        |
|                   |               | Collectorate, Jodhpur  | -73.9         | -63.3        | 90.7         | 0.39        | -47.3         | -40.6        | 75.7         | 0.39        | -66.7            | -57.1        | 85.1         | 0.40        |
|                   |               | Police Commi., Jaipur  | -49.8         | -48.3        | 68.1         | 0.46        | -9.6          | -9.3         | 56.3         | 0.52        | -36.8            | -35.7        | 59.7         | 0.47        |
|                   |               | Shastri Nagar, Jaipur  | -42.6         | -46.9        | 104.9        | 0.28        | -9.0          | -9.9         | 98.0         | 0.34        | -29.5            | -32.5        | 100.8        | 0.25        |
|                   |               | ShrinathPuram, Kota    | 10.4          | 15.5         | 52.9         | 0.44        | 80.1          | 119.0        | 108.8        | 0.39        | 79.1             | 118.2        | 116.1        | 0.36        |
|                   |               | Indira Vistar, Pali    | -49.8         | -54.5        | 105.1        | 0.29        | -24.3         | -26.6        | 97.0         | 0.26        | -36.1            | -39.5        | 99.0         | 0.26        |
|                   |               | Ashok Nagar, Udaipur   | -39.6         | -48.7        | 66.3         | 0.38        | -18.5         | -22.8        | 60.2         | 0.35        | -25.0            | -30.8        | 60.0         | 0.34        |
|                   |               | <b>Average</b>         | <b>-43.1</b>  | <b>-45.9</b> | <b>84.9</b>  | <b>0.36</b> | <b>-7.6</b>   | <b>-8.1</b>  | <b>83.5</b>  | <b>0.37</b> | <b>-22.3</b>     | <b>-23.8</b> | <b>87.5</b>  | <b>0.32</b> |
